# Supplementary material for: Selective removal of nitroaromatic compounds from wastewater in an integrated zero valent iron (ZVI) reduction and ZVI/H2O2 oxidation process
Source: Royal Society of Chemistry journal article supplement (doi:10.1039/c5ra08487c), 2015-01-01
Supplement: c5ra08487c1.pdf [file c5ra08487c1.pdf]

**Supporting Information**

**For**

**Selective removal of nitroaromatic compounds from wastewater in an integrated  
zero valent iron (ZVI) reduction and ZVI/H<sub>2</sub>O<sub>2</sub> oxidation process**

Jianguo Liu<sup>1</sup>, Changjin Ou<sup>1</sup>, Weiqing Han, Faheem, Jinyou Shen\*, Huiping Bi,

Xiuyun Sun, Jiansheng Li, Lianjun Wang\*

*Jiangsu Key Laboratory for Chemical Pollution Control and Resources Reuse, School  
of Environmental and Biological Engineering, Nanjing University of Science and  
Technology, Nanjing, 210094, China*

Corresponding author: \*Jinyou Shen, Tel/Fax: +86 25 84303965, E-mail address:  
shenjinyou@mail.njust.edu.cn; \*Lianjun Wang, Tel/Fax: +86 25 84315941, E-mail  
address: wanglj@mail.njust.edu.cn.

<sup>1</sup>These authors contributed to the paper equally.

**Table S1** Characteristics of DNAN producing wastewater

| Parameter                        | Value     |
|----------------------------------|-----------|
| pH                               | 7.2       |
| COD (mg/L)                       | 34000±985 |
| TOC (mg/L)                       | 7151±329  |
| DNAN (mg/L)                      | 123.1±3.8 |
| DNCB (mg/L)                      | 249.3±6.9 |
| DNP (mg/L)                       | 110.4±4.2 |
| Salinity (%)                     | 3.3       |
| EC <sub>50, 48 h (v/v)</sub> (%) | 0.67      |

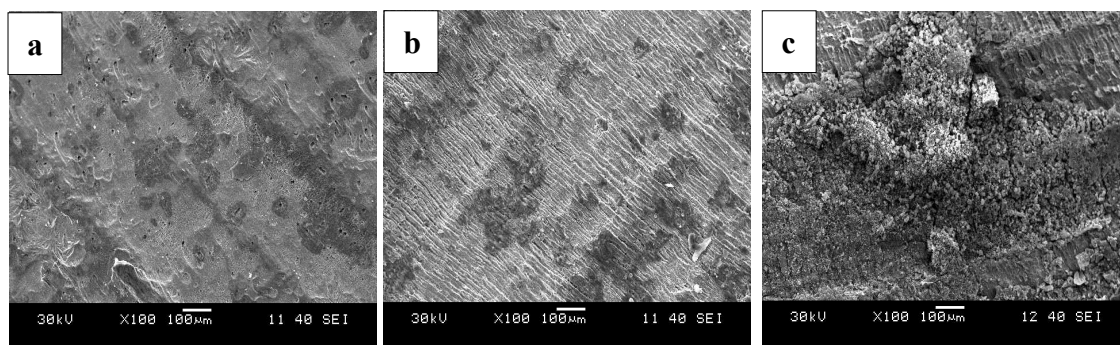

**Fig.S1** SEM images of fresh ZVI (a), ZVI shavings after reduction (b) and ZVI shavings after oxidation (c)

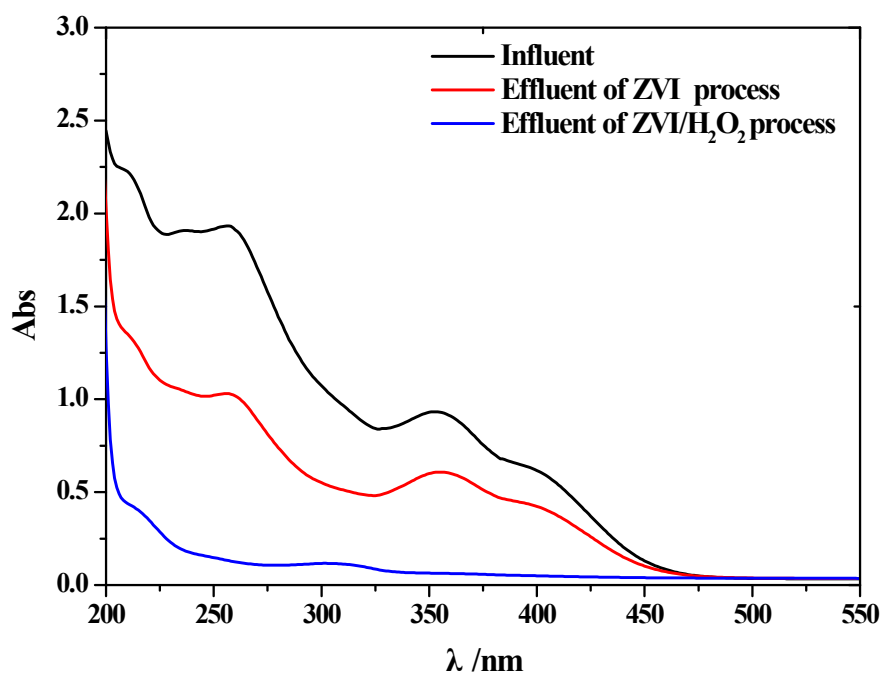

**Fig.S2** Evolution of UV-vis spectra before and after treatment

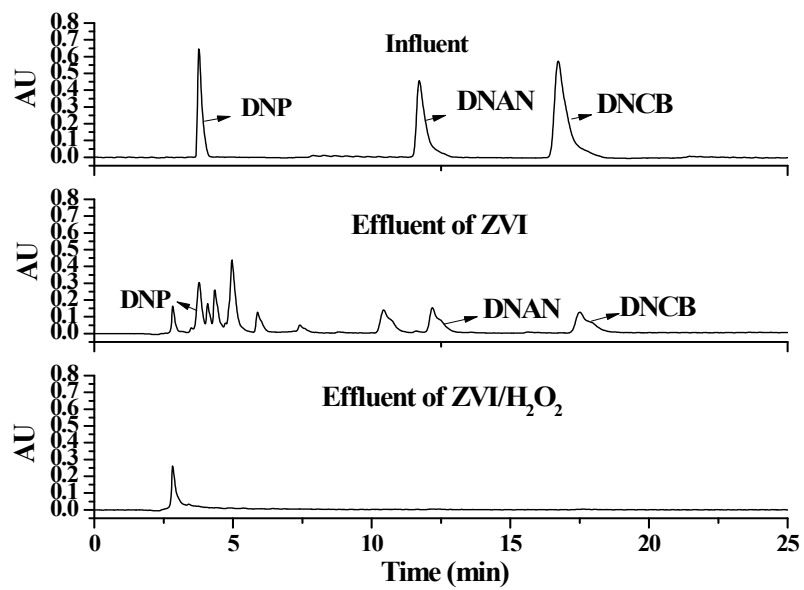

**Fig.S3** Evolution of HPLC spectra before and after treatment
